# Supplementary material for: Serum neuron-specific enolase (NSE) is associated with the overall survival of colorectal cancer: a retrospective study
Source: PeerJ. 2024 Nov 22;12:e18617. doi: 10.7717/peerj.18617 (PMC11587878; doi:10.7717/peerj.18617)
Supplement: Supplemental Information 3 [file peerj-12-18617-s003.xlsx]

## Sheet: Sheet1
sex	ethnicity	smoke_history	liquor_history	age_diagnosis	BMI	clinical_stage	curative_operation	chemotherapy	status	time	NLR	ALB	AFP	CEA	CA125	CA19-9	NSE
Male	Han	Yes	Yes	44	20.7612	Stage III-IV	No	No	0	281	3.0069	47.07	1.76	1513	20.05	494.5	51.94
Female	Han	No	No	66	25	Stage III-IV	No	No	0	1009	4.10714	45	3.56	92.45	12.64	0.6	9.11
Male	Han	No	No	41	20.0474	Stage I-II	Yes	Yes	0	1556	2.92424	35.27	1.6	30.9	14.17	27.92	10.84
Male	Han	No	No	62	21.7181	Stage III-IV	No	Yes	0	18	2.09021	42.45	3.4	64.39	15.24	879.2	40.06
Male	Han	Yes	Yes	52	19.052	Stage III-IV	No	Yes	0	917	2.01005	42.2	1.6	59.21	14.31	81.74	9.75
Male	Han	Yes	Yes	52	24.2215	Stage III-IV	No	Yes	0	548	2.31492	52.6	2.64	39.07	9.54	53.71	7.45
Male	Han	No	No	61	20.7612	Stage III-IV	No	Yes	1	262	0.987903	49.12	2.73	80.45	12.39	10.95	15.88
Female	Han	No	No	48	25	Stage III-IV	Yes	Yes	1	56	3.65672	41.6	1.51	2.24	17.31	273.7	17.82
Male	Han	Yes	Yes	60	21.3039	Stage III-IV	No	No	1	648	2.30328	32.1	3.79	16.8	12.45	7.64	11.89
Female	Han	No	No	46	20.8889	Stage III-IV	Yes	Yes	1	439	1.89571	42	3.61	238.7	107.2	120.9	11.4
Male	Han	No	No	42	23.03	Stage III-IV	Yes	Yes	0	964	3.2	47.03	3.2	20.09	6.5	38.13	7.85
Male	Han	No	No	62	30.4878	Stage I-II	No	No	0	861	1.30201	46.63	3.13	1.4	13.09	59.52	13.47
Male	Han	Yes	Yes	69	20.9366	Stage III-IV	No	Yes	1	33	2.62234	39.6	2.29	14.22	13.41	21.33	19.6
Male	Han	Yes	Yes	76	23.5237	Stage III-IV	No	Yes	1	766	3.7619	49.65	2.09	9.15	9.54	13.55	19.1
Male	Han	Yes	Yes	66	19.7239	Stage I-II	Yes	Yes	1	713	1.56311	46.3	2.13	4.4	15.26	6.64	25.74
Male	Han	No	No	35	28.0102	Stage III-IV	No	Yes	0	301	3.00629	49.8	2.4	25.94	5	10.03	11.38
Female	Han	No	No	50	18.424	Stage III-IV	No	No	0	856	3.08955	49.7	1.94	2.23	17.86	29.03	19.71
Female	Han	No	No	73	19.7239	Stage III-IV	No	No	1	168	4.47436	39.7	4.33	29.41	46.91	187.4	13.36
Female	Han	Yes	Yes	61	30.8642	Stage III-IV	No	Yes	0	87	2.15951	46.77	2.26	5.53	10.83	11.89	11.24
Male	Han	No	No	77	23.1473	Stage III-IV	Yes	Yes	0	831	1.31298	44.5	2.52	3.9	11.64	21.01	13.65
Male	Han	No	No	78	24.4646	Stage III-IV	No	Yes	1	563	3.66187	45.7	1.99	2.27	7.55	47.43	13.91
Male	Han	No	No	67	22.3094	Stage III-IV	Yes	No	0	1275	2.02286	46.5	6.56	1.82	19.93	9.7	15.44
Male	Han	No	No	50	20.7612	Stage III-IV	No	Yes	0	907	5.36607	44.5	2.92	8.17	10.88	41	10.5
Female	Han	No	No	40	26.6728	Stage III-IV	No	Yes	0	52	1.7044	42.7	2.44	8.78	29.97	16.86	19.22
Male	Han	Yes	Yes	73	23.8754	Stage I-II	No	Yes	0	1800	2.38415	48.23	3.64	1.14	14.03	6.68	17.17
Female	Minorities	No	No	68	31.2175	Stage III-IV	No	Yes	0	68	1.51103	38.58	3.09	2.92	9.82	70.35	8.87
Male	Han	Yes	Yes	56	21.9261	Stage I-II	Yes	Yes	0	977	1.42408	40.99	3.57	2.96	7.55	6.59	11.24
Female	Han	No	No	42	19.5556	Stage I-II	Yes	No	0	1259	2.43529	49.81	2.51	1.26	10.35	17.14	7.39
Female	Han	No	No	50	25.8065	Stage I-II	No	Yes	0	849	1.44737	49.9	4.72	2.41	21.6	9.09	14.41
Male	Han	No	No	70	24.0055	Stage I-II	No	Yes	0	1338	1.86802	44.41	2.88	1.98	8.69	10.82	12.46
Male	Han	No	No	49	23.5615	Stage III-IV	No	Yes	1	749	2.77941	48.3	3.11	111.5	11.25	40.61	16.67
Female	Han	Yes	Yes	49	25.9107	Stage III-IV	No	No	0	8	3.11724	37.6	2.77	181.6	37.01	116.9	9.52
Female	Han	No	No	62	20.4152	Stage I-II	Yes	Yes	0	1162	1.80288	45.98	3.42	0.848	8.62	8.95	12.56
Male	Han	Yes	Yes	63	19.3772	Stage III-IV	Yes	No	1	601	1.25108	44.8	2	2.79	6.41	7.35	18.87
Male	Han	Yes	Yes	65	22.1453	Stage III-IV	No	Yes	0	409	1.09735	46	4.96	7.99	12.6	20.59	11.16
Male	Minorities	No	No	45	23.1405	Stage III-IV	Yes	Yes	0	1679	1.56087	52.14	3.2	31.13	12.59	7.5	11.89
Female	Han	No	No	58	26.8352	Stage III-IV	Yes	Yes	0	1050	2.22566	42.8	2.16	2.48	18.81	19.85	11.57
Male	Han	No	No	39	29.0698	Stage III-IV	Yes	Yes	0	1450	1.65574	44.42	2.64	2.71	11.66	25.22	20.13
Male	Minorities	No	No	68	19.8347	Stage III-IV	Yes	Yes	1	641	1.31356	46.1	3.24	11.03	13.14	48.85	11.48
Male	Han	Yes	Yes	63	17.9012	Stage I-II	Yes	No	0	1964	0.743842	41.5	2.52	2.4	17.92	18.37	9.46
Male	Minorities	No	No	52	27.102	Stage III-IV	Yes	Yes	0	840	1.50649	42.3	2.86	2.56	23.1	17.54	13.22
Male	Han	Yes	Yes	58	27.3797	Stage III-IV	No	Yes	1	1611	2.79747	41.93	2.1	8.89	10.06	63.95	20.47
Male	Han	No	No	39	20.7612	Stage III-IV	No	Yes	0	151	5.63559	50.82	2.71	2636	52.98	20000	111.7
Female	Han	No	No	55	21.7153	Stage III-IV	No	Yes	1	708	2.34444	46.73	4	5.57	281	12.27	15.03
Male	Han	Yes	Yes	70	22.5827	Stage III-IV	No	Yes	1	42	7.13103	32.5	3.47	8102	82.79	20000	54.77
Male	Han	Yes	Yes	63	22.0581	Stage III-IV	No	Yes	0	897	3.13235	46.1	2.9	12.98	14.28	0.6	11.29
Male	Han	Yes	Yes	64	22.4059	Stage I-II	Yes	Yes	0	1056	1.84141	45.9	6.55	1.87	9.82	9.96	10.65
Male	Minorities	Yes	Yes	66	18.3058	Stage III-IV	No	No	0	602	1.24862	53.6	2.5	14.89	10.69	62.77	14.36
Female	Minorities	No	No	64	19.4771	Stage I-II	Yes	Yes	0	1628	0.973913	40.7	2.48	2.67	23.73	19.51	14.11
Male	Han	Yes	Yes	74	24.5675	Stage III-IV	No	Yes	0	20	3.48611	46.3	5.63	22.86	8.87	22.38	12.97
Female	Han	No	No	47	24.8889	Stage III-IV	No	No	1	464	3.73077	33	2.17	8	25.34	24.37	11.2
Male	Han	No	No	53	28.0428	Stage III-IV	No	Yes	1	554	1.85315	40	2.83	3.22	15.36	5.62	11.58
Male	Han	No	No	63	23.03	Stage I-II	Yes	Yes	0	1405	2.03933	45.7	7.03	2.37	10.23	12.32	13.89
Male	Han	Yes	No	58	20.9042	Stage III-IV	No	No	1	202	1.30526	43.3	2.54	48.41	6.85	181.4	16.33
Female	Han	No	No	41	28.5156	Stage III-IV	No	Yes	0	1400	6.83562	42.8	1.61	8.39	374.3	171.7	37.35
Female	Han	No	No	53	17.2635	Stage III-IV	No	Yes	0	994	3.96552	37.9	1.85	32.77	7.49	34.29	9.26
Male	Han	Yes	Yes	73	24.0055	Stage III-IV	No	No	0	10	0.870861	49.72	2.92	3.6	55.4	0.6	11.74
Female	Minorities	No	No	67	25	Stage I-II	No	No	0	296	2.26347	42.7	3.44	6.03	19.22	22.97	14.1
Male	Han	No	No	58	23.1405	Stage I-II	No	Yes	0	1334	1.9	47.52	3.89	2.37	9.59	7.39	20.5
Male	Han	No	No	63	24.2215	Stage I-II	Yes	Yes	0	1789	1.71318	43.55	2.47	16.72	8.28	15.22	10.65
Female	Han	No	No	45	23.0518	Stage III-IV	Yes	Yes	0	1009	1.08696	43.6	2.71	2.43	12.81	12.76	11.19
Male	Han	Yes	Yes	46	24.6914	Stage I-II	Yes	Yes	0	1173	4.01681	44.87	3.07	3.87	12.8	6.28	12.72
Female	Han	No	No	74	23.7332	Stage I-II	Yes	Yes	0	1224	0.746939	51.31	2.88	5.51	15.78	12.02	12.92
Male	Han	Yes	Yes	64	17.4191	Stage III-IV	No	No	1	279	4.0614	34.58	2.35	56.5	18.04	30.78	15.41
Male	Han	Yes	Yes	69	20.5761	Stage III-IV	No	Yes	0	1327	2.18605	44.9	4.75	2.69	8.27	6.05	11.51
Male	Han	Yes	Yes	69	23.8754	Stage I-II	No	No	0	1001	1.37952	48	2.54	1.61	12.25	9.77	11.13
Male	Han	No	No	70	22.1367	Stage I-II	Yes	Yes	0	1036	2.59712	45	2.59	29.28	10.19	26.46	8.89
Female	Minorities	No	No	69	22.6667	Stage III-IV	No	Yes	0	66	2.13376	45.4	2.35	20.44	17.18	915.6	18.51
Male	Han	Yes	Yes	48	24.2215	Stage III-IV	No	Yes	1	184	4.67742	45.5	2.14	77.44	59.27	9515	146.5
Female	Han	No	No	76	19.3962	Stage III-IV	Yes	Yes	0	1477	1.64286	41.1	4.8	1.8	14.32	6.72	10.73
Male	Han	Yes	Yes	53	26.3656	Stage III-IV	No	Yes	0	558	1.81148	48.7	2.35	3.85	8.93	8.66	11.38
Male	Han	Yes	Yes	50	23.3067	Stage III-IV	No	No	1	229	3.88936	43.66	1.47	17.34	6.83	756.4	27.4
Male	Han	No	No	64	20.4294	Stage I-II	Yes	Yes	0	1001	0.679012	38.8	5.42	11.84	20.26	34.81	14.94
Male	Han	No	No	60	23.1834	Stage III-IV	No	Yes	0	1810	4.72619	52.53	5.81	57.88	11.66	2.66	15.03
Male	Han	No	No	83	21.875	Stage III-IV	No	No	1	98	3.55172	32.7	2.46	299.7	30.45	365.7	23.16
Male	Han	No	No	61	24.5578	Stage III-IV	No	Yes	0	852	2.68627	45	8.33	204.9	7.95	7.8	15.98
Female	Minorities	No	No	64	26.8352	Stage III-IV	No	Yes	0	70	1.97842	48.5	2.8	28.53	47.84	45.82	14.05
Female	Han	Yes	Yes	76	22.3703	Stage I-II	No	No	0	2021	1.19095	46.73	2.39	0.821	15.32	1.2	13.76
Female	Han	No	No	61	25.5661	Stage I-II	Yes	No	0	1478	1.63025	48.76	2.52	1.14	17.81	8.83	15.86
Male	Han	Yes	Yes	41	23.4375	Stage I-II	Yes	No	0	2280	2.28696	45.54	3.54	2.76	17.72	9.98	10.96
Male	Han	Yes	Yes	65	21.8776	Stage III-IV	Yes	Yes	0	1657	2.31818	43.25	1.48	4.41	8.55	17.29	12.94
Female	Han	No	No	49	26.8136	Stage I-II	Yes	No	0	1308	1.51205	46.76	6.2	2.06	13.59	24.88	13.1
Male	Han	No	No	69	24.8016	Stage I-II	No	No	1	229	2.60544	42.37	6.63	20.01	24.91	23.9	9.6
Male	Han	No	No	70	26.8923	Stage III-IV	Yes	No	0	1830	2.57047	49.73	2.35	4.19	9.12	8.13	13.96
Female	Han	No	No	68	22.4996	Stage III-IV	Yes	Yes	0	1394	2.27976	47.39	5.41	2.18	6.49	22.55	14.15
Female	Han	No	No	42	20	Stage I-II	No	No	0	1112	2.53927	49.36	2.28	11.37	8.65	50.98	16.79
Male	Han	No	No	51	18.424	Stage I-II	No	Yes	0	593	1.48108	42	1.6	1.18	23.15	8.79	9.09
Male	Han	Yes	Yes	65	22.4913	Stage III-IV	No	Yes	0	504	1.74566	45.5	2.67	12.49	10.54	122.1	15.1
Male	Han	Yes	Yes	62	31.2452	Stage III-IV	No	Yes	1	210	2.44138	40.45	3.68	968.2	127.2	18184	14.56
Female	Han	Yes	Yes	53	21.8787	Stage III-IV	No	No	1	289	1.86525	51.25	32.43	40.76	25.2	2610	14.81
Male	Minorities	No	No	73	22.0317	Stage I-II	Yes	No	0	1598	2.11927	43.3	2.75	9.02	10.86	10.81	12.54
Male	Han	Yes	Yes	63	26.3465	Stage I-II	No	No	0	606	1.82288	48.3	2.23	2.76	18.4	4.39	14.85
Male	Han	No	No	73	19.433	Stage III-IV	No	No	1	43	6.14789	32.87	2.09	28056	103.1	11604	64.73
Male	Han	Yes	Yes	71	20.7612	Stage III-IV	No	No	1	372	2.62595	43.23	2.24	63.37	10.13	570.3	12.98
Male	Han	Yes	Yes	71	27.2509	Stage I-II	Yes	Yes	0	1052	1.08163	52.4	3.86	49.65	18.45	2.45	22.89
Male	Han	Yes	Yes	54	25.8645	Stage I-II	No	No	0	1712	1.30655	44.88	3.33	1.79	9.67	8.37	14.71
Female	Han	Yes	Yes	57	18.1787	Stage I-II	No	No	0	9	2.95364	39.21	1.48	30.11	25.49	11.84	13.66
Female	Han	No	No	66	22.2222	Stage III-IV	No	No	0	264	1.75556	44.6	4.44	19.95	21.44	6.99	13.38
Male	Han	No	No	54	24.2215	Stage III-IV	Yes	Yes	0	918	0.992293	47	2.62	2.29	8.27	9.65	20.39
Male	Han	Yes	Yes	53	16.3847	Stage I-II	No	No	0	1632	1.33708	44.92	3.21	5.02	14.26	1.02	8.6
Male	Han	No	No	47	21.9713	Stage I-II	No	Yes	1	941	2	41.32	2.65	1.72	11.42	6.91	9.36
Female	Minorities	No	No	44	21.7778	Stage III-IV	Yes	No	1	1334	2.02667	44.45	3.74	1.49	30.4	5.31	7.56
Male	Han	Yes	Yes	60	23.3067	Stage III-IV	Yes	Yes	1	128	1.50543	43.6	3.52	8.05	13.58	26.81	12.37
Male	Han	No	No	56	24.093	Stage III-IV	No	Yes	0	395	3.88889	47.9	2.9	104.2	9.02	26.06	10.93
Male	Han	Yes	Yes	71	21.7993	Stage III-IV	No	No	1	449	2.13757	41.5	3.69	27.48	7.23	2.5	18.18
Female	Minorities	No	No	32	20.7612	Stage III-IV	Yes	Yes	0	862	1.37805	46.9	1.88	4.07	8.87	11.15	11.87
Male	Han	No	No	61	20.7612	Stage III-IV	Yes	No	1	977	1.82667	37.66	3.6	4.11	19.67	15.63	17.29
Female	Minorities	No	No	43	24.3141	Stage I-II	Yes	No	0	1484	0.972332	47.55	1.96	1.6	6.45	7.24	11.44
Male	Han	No	No	72	21.1073	Stage I-II	Yes	No	0	1520	2.63866	45.32	1.68	0.71	14.38	7.33	10.54
Male	Han	No	No	62	20.202	Stage III-IV	Yes	Yes	0	1531	1.53977	44.8	3.54	8.48	6.67	8.24	9.86
Female	Han	Yes	No	62	16.6335	Stage III-IV	Yes	No	0	2084	1.27459	44.36	2.57	4.7	13.84	24.12	14.04
Male	Han	Yes	Yes	65	19.1467	Stage III-IV	No	No	1	373	1.54342	36.33	2.62	27.12	24.03	21.43	18.87
Male	Han	Yes	Yes	55	27.6361	Stage III-IV	No	No	0	502	2.04242	52.1	3.06	2	8.82	14.89	12.75
Male	Minorities	Yes	Yes	60	26.2985	Stage III-IV	Yes	Yes	0	1290	1.67797	44.49	8.18	6.63	16.4	4.89	17.68
Male	Han	Yes	Yes	70	16.3304	Stage I-II	Yes	No	1	1437	2.09677	31.96	4.15	2.03	8.62	8.73	7.86
Female	Han	No	No	35	22.8329	Stage III-IV	No	Yes	0	573	1.71963	43.9	3.3	10.29	12.94	69.06	21.06
Female	Han	No	No	62	21.8787	Stage I-II	Yes	No	0	19	1.20398	42.35	2.77	6	16.62	9.03	16.44
Female	Han	No	No	61	22.8928	Stage III-IV	Yes	Yes	0	499	1.48299	49.7	1.87	5.2	9.74	14.64	13.75
Male	Minorities	No	No	82	20.5191	Stage III-IV	Yes	No	0	1469	2.60959	40.49	2.98	7	10.91	34.38	9.71
Male	Han	Yes	Yes	65	26.6728	Stage I-II	No	No	0	1879	2	43.53	2.44	8.95	25.62	1.65	8.11
Male	Han	No	No	47	21.1073	Stage III-IV	No	Yes	1	101	1.81159	45.4	3.87	350.9	19.28	9.39	22.63
Female	Han	No	No	77	25.4524	Stage I-II	Yes	No	0	489	1.9262	46.2	6.19	1.32	19.99	15.78	12.21
Male	Han	Yes	Yes	52	20.7612	Stage III-IV	Yes	Yes	0	1526	2.45704	45.83	2.21	89.26	8.97	1.14	13.34
Female	Han	No	No	53	23.5556	Stage I-II	No	No	0	895	1.37308	56	2.18	1.38	56.63	9.86	16.96
Female	Han	Yes	Yes	32	20.9366	Stage III-IV	No	No	0	128	7.89815	39.2	4.04	3.18	559.4	2274	39.98
Female	Han	No	No	64	29.6875	Stage III-IV	No	No	0	934	2.64151	43.58	2.47	2.95	20.45	20.68	12.37
Male	Han	Yes	Yes	44	20.202	Stage III-IV	Yes	No	1	95	2.08197	46.3	2.23	32.22	10.14	168	19.7
Male	Han	Yes	Yes	66	20.8117	Stage III-IV	Yes	Yes	0	968	1.69481	43.5	3.68	5.88	13.89	29.15	17.11
Male	Han	No	No	54	26.5338	Stage I-II	No	Yes	0	1286	1.63107	47.77	3.55	2.8	4.96	7.78	10.1
Male	Han	No	No	47	20.8209	Stage III-IV	Yes	Yes	0	924	1.37395	42.6	5.79	17.76	6.67	55.66	8.41
Male	Han	Yes	Yes	63	24.7252	Stage I-II	No	No	0	2122	0.934483	45.15	2.36	2.51	9.51	13.56	9.63
Male	Han	No	No	56	28.125	Stage I-II	Yes	Yes	0	1446	1.64901	50.1	3.55	3.81	6.3	16.1	13.25
Female	Han	No	No	73	24.4444	Stage III-IV	No	No	0	1028	0.787645	40.2	1.93	3.93	12.09	0.6	6.74
Female	Han	No	No	67	26.6667	Stage III-IV	No	No	1	247	2.35152	43.4	2.57	25.23	7.53	78.51	16.28
Male	Han	Yes	Yes	54	26.7299	Stage III-IV	Yes	Yes	0	1518	1.52518	47.6	1.69	3.89	10.01	1.17	8.65
Female	Han	No	No	61	18.6667	Stage III-IV	Yes	Yes	0	912	1.02451	51.32	0.614	172.4	12.97	1.15	15.81
Male	Han	No	No	64	23.8367	Stage I-II	No	No	0	668	2.46479	45.78	5.14	2.48	10.66	9.23	14.66
Male	Han	Yes	Yes	66	19.3772	Stage III-IV	No	Yes	1	174	2.12931	43.14	3.31	1508	104	9670	40.8
Male	Han	No	No	33	22.0386	Stage III-IV	No	Yes	1	340	0.806349	51.46	4.6	9.88	22.47	85.58	13.38
Female	Han	No	No	47	24.6094	Stage III-IV	Yes	Yes	1	392	9.20202	43.6	2.26	0.853	27.04	22.02	10.63
Female	Han	Yes	Yes	51	22.0317	Stage I-II	No	No	0	1054	1.30279	50.1	4.68	1.07	6.72	6.61	12.4
Female	Han	Yes	Yes	54	29.4758	Stage I-II	Yes	No	0	2297	1.52609	42.31	2.31	1.52	16.16	29.81	7.25
Female	Han	Yes	Yes	56	20.4491	Stage I-II	Yes	No	0	293	1.82727	46.8	2.13	1.75	14.32	63.24	9.17
Female	Han	No	No	57	25.1532	Stage I-II	Yes	Yes	0	1581	9.16667	36.27	3.81	0.769	12.9	5.45	11.82
Female	Han	Yes	Yes	78	26.6667	Stage I-II	No	No	0	1595	1.20755	45.46	2	1.15	15.33	2.84	9.92
Female	Han	No	No	58	22.6562	Stage III-IV	No	No	0	839	1.18894	47.74	2.81	21.65	9.81	6.94	17.66
Female	Han	No	No	48	21.7778	Stage I-II	Yes	Yes	0	1114	2.18085	38.44	3.81	14.48	20	120.9	8.75
Male	Han	Yes	Yes	57	23.1834	Stage III-IV	No	No	1	90	3.63226	46.27	2.17	143.3	20.74	125	40.4
Male	Han	Yes	No	81	18.3655	Stage III-IV	No	No	1	357	4.16471	38.5	2.03	27.32	24.39	0.6	14.81
Female	Han	No	No	51	20.7612	Stage III-IV	No	Yes	0	670	1.80117	44.96	3.39	24.12	19.91	38.85	7.66
Male	Han	Yes	Yes	54	22.8624	Stage III-IV	Yes	Yes	1	908	2.50455	47.7	4.99	4.23	9.03	31.51	22.94
Male	Han	Yes	Yes	53	24.3911	Stage I-II	Yes	Yes	0	712	3.02186	45.3	6.27	0.989	9.8	33.35	14.68
Female	Han	No	No	64	20.9644	Stage I-II	No	No	0	2172	0.737864	46.35	1.04	3.57	11.41	10.39	20.14
Female	Minorities	No	No	45	24.4352	Stage III-IV	Yes	Yes	0	405	1.53947	46.8	1.7	2.55	43.98	105.1	24.09
Male	Minorities	No	No	73	20.7612	Stage III-IV	No	No	1	844	1.5748	40	1.76	2.68	18.96	0.6	12.37
Male	Han	Yes	Yes	47	25.9107	Stage I-II	No	No	0	1968	1.27551	48.36	4.64	6.77	12.33	8.69	10.94
Male	Han	No	No	76	22.5896	Stage III-IV	Yes	Yes	1	509	1.76804	44.76	2.95	3.45	21.58	12.8	15.93
Male	Han	No	No	67	20.5151	Stage I-II	Yes	No	0	1495	1.48555	40.66	9.38	4.17	9.19	0.768	10.28
Female	Han	No	No	74	22.1893	Stage III-IV	No	Yes	0	657	1.21348	41.6	1.94	1.84	14.25	13.67	12.11
Male	Han	Yes	Yes	59	21.9671	Stage I-II	No	No	0	2067	3.05505	46.49	5.93	1.23	22.06	10.18	11.8
Male	Han	Yes	Yes	61	20.7612	Stage III-IV	No	Yes	1	251	1.89268	36.8	2.3	6.63	16.26	6	15.64
Male	Han	No	No	44	20.7612	Stage III-IV	No	No	0	8	2.00377	44.3	1.64	25.41	20.73	128.2	14.6
Male	Minorities	Yes	Yes	62	25.0593	Stage I-II	Yes	Yes	0	1414	3	47.37	5.46	2.99	8.69	3.32	12.3
Male	Han	Yes	Yes	76	17.6471	Stage I-II	No	Yes	1	871	1.34965	40.47	4.06	2.46	13	18.02	10.02
Male	Han	No	No	57	22.8624	Stage III-IV	No	Yes	1	637	1.33333	44.06	3.35	7.58	6.05	3.28	12.03
Female	Han	No	No	48	20.0288	Stage III-IV	Yes	Yes	0	981	1.92647	43.9	2.35	2.7	11.53	8.95	11.52
Male	Han	Yes	Yes	69	22.9481	Stage III-IV	No	Yes	0	140	5.19178	46.42	2.73	958.8	10.81	1169	12.24
Male	Han	Yes	No	78	19.7232	Stage I-II	Yes	No	0	858	3.80952	47.2	5.01	7.67	43.2	22.68	10.67
Male	Han	Yes	Yes	66	21.2585	Stage I-II	Yes	Yes	0	440	3.32278	41.3	6.07	35.29	13.6	16.29	15.56
Female	Han	No	No	36	20.3125	Stage I-II	Yes	Yes	0	1393	4.65789	38	1.9	12.68	12.15	11.68	12.78
Female	Han	No	No	56	21.4533	Stage I-II	Yes	No	0	1014	1.83832	58.7	4.35	1.12	17.4	17.14	21.84
Male	Han	Yes	No	37	15.7943	Stage I-II	No	Yes	0	2205	4.21831	44.69	2.96	1.87	6.84	30.27	13.59
Female	Han	No	No	50	20.7612	Stage III-IV	No	Yes	1	370	2.62944	42	3.41	1390	10.22	2.28	13.15
Male	Han	Yes	Yes	44	23.8751	Stage III-IV	No	Yes	1	181	12.5758	28	2.74	82.22	46.09	66.68	15.48
Male	Han	No	No	66	18.7328	Stage III-IV	Yes	Yes	0	1115	2.49419	41.8	1.57	8.2	9.13	26.18	10.23
Female	Han	No	No	33	19.0443	Stage III-IV	No	No	0	9	1.71676	48.84	0.883	0.915	11.35	14.04	14.96
Male	Han	No	No	63	23.4375	Stage III-IV	No	Yes	0	1553	1.80519	47.11	7.57	2.9	15.22	1.06	9.93
Female	Han	No	No	61	18.4911	Stage III-IV	No	No	0	378	1.74872	51.5	6.65	2.23	22.43	17.06	11.03
Male	Han	No	Yes	65	20.5693	Stage III-IV	No	Yes	0	103	5.76923	44.3	4.11	8.53	7.59	0.6	12.75
Male	Han	Yes	Yes	63	17.301	Stage III-IV	No	No	1	305	2.76518	48.3	2.59	79.26	12.86	20.63	28.14
Male	Han	Yes	Yes	69	20.1172	Stage III-IV	Yes	Yes	0	621	1.49248	45.17	2.38	3.15	6.49	29.83	9.67
Male	Han	No	No	70	21.7079	Stage III-IV	Yes	Yes	0	1546	2.16667	44.14	1.53	10.16	10.79	1966	8.65
Male	Han	Yes	Yes	54	21.9671	Stage III-IV	Yes	Yes	0	775	1.54475	50.6	3.57	2.79	5.28	13.09	15.19
Male	Han	Yes	Yes	71	21.4533	Stage III-IV	No	No	0	6	3.60234	40.52	1.53	18.85	21.11	9.71	14.83
Female	Han	No	No	68	15.1925	Stage III-IV	No	No	1	19	3.40764	35.8	6.11	38.38	35.41	31.23	50.39
Male	Han	No	No	38	14.6924	Stage I-II	No	No	0	9	2.11111	42.51	1.77	2.64	43.64	19.55	17.75
Female	Han	No	No	55	18.3655	Stage III-IV	No	Yes	1	193	2.91964	47.7	2.59	847.6	10.62	194.9	41.91
Male	Han	Yes	No	61	24.1672	Stage III-IV	Yes	Yes	0	1965	1.70696	42.21	3.24	4.09	9.98	12.8	13.9
Female	Han	Yes	Yes	51	20.7612	Stage I-II	No	No	0	1526	1.64062	44.39	2.13	2.57	14.49	7.24	12.31
Female	Han	No	No	38	20.83	Stage III-IV	Yes	Yes	0	402	2.38281	50	2.29	151.2	28.3	3.53	13.05
Male	Han	Yes	Yes	54	21.2183	Stage III-IV	No	Yes	0	53	1.1284	39.5	4.83	5.76	18.54	24.65	16.99
Male	Han	No	No	56	27.4348	Stage III-IV	Yes	Yes	0	708	2.05263	45.9	2.81	7.06	9.53	7.55	13.28
Female	Minorities	No	No	52	27.6398	Stage III-IV	Yes	Yes	0	413	3.75316	45.1	1.54	35.07	41.44	31.02	13.46
Female	Han	No	No	68	20.2694	Stage III-IV	No	Yes	1	441	1.76398	50.8	5.48	8.02	6.62	1006	15.64
Male	Han	No	No	59	18.6851	Stage III-IV	Yes	No	1	944	1.86957	44.9	8.58	28.95	8.75	0.67	13.58
Male	Minorities	Yes	Yes	33	20.7612	Stage III-IV	No	No	1	107	2.63498	47.6	3.01	1.3	7.21	4.25	9.13
Female	Han	No	No	65	20.7612	Stage III-IV	Yes	No	0	1180	2.22807	43.83	1.56	0.87	17.17	10.22	10.68
Male	Han	No	No	63	19.433	Stage III-IV	No	No	1	295	1.67742	47.6	4.03	38.12	11.14	0.6	14.33
Female	Han	No	No	67	17.1875	Stage III-IV	No	No	0	11	6.80702	28.2	2.33	3.75	23.01	84.21	6.44
Male	Han	Yes	Yes	39	23.7228	Stage I-II	No	No	0	2017	1.87919	48.43	4.37	2.06	21.57	1.17	10.73
Female	Han	No	No	61	21.6441	Stage III-IV	Yes	No	0	2082	0.847584	46.15	1.63	2.23	24.4	39.72	12.92
Female	Han	No	No	63	20.7612	Stage III-IV	Yes	No	1	380	2.75796	49.49	3.52	7.42	19.55	11.96	11.8
Male	Han	Yes	Yes	57	21.2306	Stage III-IV	Yes	Yes	0	535	1.59551	43.6	4.55	22.66	30.86	65.39	13.62
Male	Minorities	Yes	Yes	64	22.4323	Stage III-IV	No	Yes	1	321	1.27805	44.64	3.76	15.46	9.77	1.7	65.47
Male	Han	Yes	Yes	75	20.7612	Stage I-II	Yes	No	0	1196	2.58621	47.66	2.14	62.77	9.54	56.42	8.5
Male	Han	No	No	51	21.4844	Stage III-IV	Yes	Yes	0	1488	3.34197	42.95	4.25	3.08	10.68	10.38	14.15
Male	Han	No	No	50	21.5139	Stage III-IV	No	Yes	0	389	5.16304	44	3.46	13.44	7.87	1179	14.42
Female	Han	No	No	75	22.8928	Stage III-IV	Yes	Yes	0	672	0.638596	45.5	4.48	138.2	14.18	1.93	12.14
Female	Minorities	No	No	34	18.2563	Stage III-IV	No	No	0	2075	1.54902	51.57	1.61	1.24	24.46	15.57	9.53
Female	Han	No	No	72	22.9398	Stage I-II	Yes	No	0	905	2.26708	43	1.9	3.35	15.27	40.36	10.3
Male	Han	No	No	75	22.4766	Stage III-IV	No	No	1	77	2.57364	33.7	3.06	61.5	19.12	16.99	14.56
Female	Han	No	No	62	19.1111	Stage I-II	No	No	0	28	1.37222	55.5	3.21	6.56	20.06	37.65	17.33
Female	Han	Yes	Yes	63	25.6837	Stage I-II	No	No	0	95	1.11677	48.1	8.14	0.477	3.69	7.46	11.95
Male	Han	Yes	Yes	66	25	Stage I-II	Yes	Yes	0	1137	1.57991	45.31	3.92	2.23	6.19	11.48	14.53
Female	Han	No	No	61	25	Stage III-IV	No	No	0	28	1.34857	55.24	2.95	0.971	12.27	14.48	14.44
Female	Minorities	No	No	41	25.6055	Stage III-IV	No	Yes	1	351	2.01471	45.1	3.92	8.47	23.81	1.55	15.69
Male	Han	No	No	59	22.8571	Stage I-II	Yes	Yes	0	1247	1.32432	46.59	3.76	18.68	12.27	19.52	15.12
Female	Han	No	No	66	24.0346	Stage III-IV	Yes	No	0	555	1	43.9	4.55	3.39	10.24	2.19	14.04
Female	Han	No	No	57	23.634	Stage III-IV	Yes	Yes	0	856	1.15349	46.46	2.85	4.36	22.17	1.13	9.84
Female	Han	No	No	66	18.2868	Stage III-IV	No	Yes	0	294	1.65258	47	3.28	1.62	12.4	33.48	23.81
Female	Han	Yes	Yes	45	21.2306	Stage I-II	No	Yes	0	2007	2.08609	50.62	3.66	8.63	40.34	10.51	11.76
Female	Han	No	No	59	19.7239	Stage III-IV	No	No	1	37	4.55	50.5	4.21	74.83	14.66	4445	37.33
Male	Han	No	No	60	32.112	Stage I-II	Yes	Yes	0	1661	5.56364	39	1.47	5.63	14.26	18.02	15.13
Male	Han	Yes	Yes	72	24.841	Stage III-IV	Yes	No	0	169	1.18182	46.2	4.41	46.38	15.31	202.7	11.17
Male	Han	No	No	70	24.5351	Stage I-II	No	No	0	234	1.43056	48.9	3.47	2.49	7.88	9.1	12.28
Female	Han	Yes	Yes	63	19.5918	Stage I-II	No	No	0	1169	1.26337	49.4	1.97	3.81	11.61	15.81	15.57
Male	Han	Yes	No	82	20.9042	Stage I-II	No	No	1	246	3.2126	43.16	2.49	2.78	9.86	8.49	11.67
Female	Han	No	No	40	20.5442	Stage III-IV	Yes	No	0	2058	1.42029	45.11	4.34	34.13	32.49	186	10.67
Male	Han	Yes	No	63	23.5294	Stage III-IV	No	No	0	1029	3.98868	47.2	6.41	2.82	8.84	9.83	16.55
Female	Han	No	No	61	19.563	Stage III-IV	No	Yes	0	988	1.19435	47.1	5.18	1.57	18.12	3.89	16.4
Female	Han	No	No	65	23.0681	Stage III-IV	No	No	1	114	2.95455	39.7	7.1	65.07	9.23	58.01	12.55
Male	Minorities	No	No	65	24.1588	Stage I-II	Yes	Yes	0	1079	2.00758	46.2	5.36	5.87	12	0.6	10.46
Female	Han	No	No	55	20.3125	Stage III-IV	No	Yes	0	464	1.52555	47.3	2.66	0.72	10.99	7.09	13.18
Male	Minorities	No	No	53	19.0311	Stage I-II	Yes	Yes	0	1427	1.73663	41.21	2.29	4.71	14.47	11.82	10.62
Female	Han	No	No	59	20.5442	Stage III-IV	No	No	0	1538	1.19811	47.42	2.42	1.87	28.94	6.17	17.17
Female	Han	No	No	39	21.2084	Stage III-IV	No	Yes	0	1347	1.73946	42.93	2.99	0.849	11.25	3.86	9.93
Male	Han	Yes	Yes	73	25.9516	Stage I-II	Yes	Yes	0	1514	2.45223	45.12	4.29	3.51	16.81	36.22	12.87
Male	Han	No	No	74	20.7612	Stage I-II	No	Yes	0	455	2.24359	44	3.98	4.84	8.46	28.89	13.29
Male	Han	Yes	Yes	70	24.8016	Stage III-IV	No	No	0	487	1.03401	42.9	5.17	4.06	7.01	17.8	10.37
Male	Han	No	No	72	23.2434	Stage III-IV	Yes	Yes	0	765	2.18137	44.4	12.24	3.42	15.1	28.89	17.05
Female	Han	No	No	73	24.977	Stage III-IV	No	Yes	0	582	2.56808	49.5	3.54	76.06	12.91	72.76	13.8
Male	Han	Yes	Yes	51	22.0581	Stage III-IV	No	Yes	1	207	2.67052	48.6	4.37	3.12	8.82	13.42	16.41
Male	Han	No	No	53	23.4221	Stage I-II	Yes	Yes	0	547	3.34254	42.19	2.91	4.15	11.49	0.6	16.25
Female	Han	No	No	58	24.8777	Stage I-II	Yes	No	0	360	3.03333	50	1.72	51.05	11.49	1.78	18.88
Female	Han	No	No	60	23.4375	Stage III-IV	Yes	Yes	1	175	3.05	37.1	3.46	7.45	36.64	70.51	20.29
Female	Han	No	No	59	17.301	Stage III-IV	Yes	Yes	0	814	1.51479	47.8	4.06	2.74	13.55	10.23	15.32
Female	Han	No	No	67	19.2234	Stage III-IV	No	No	1	654	1.29289	40.6	2.71	3.83	4.91	6.61	9.68
Male	Minorities	Yes	Yes	59	23.5078	Stage III-IV	Yes	Yes	0	1079	1.87838	50.4	4.57	9.32	4.73	0.636	11.84
Male	Han	No	No	62	22.1453	Stage III-IV	No	Yes	1	372	3.87293	36.3	3.45	20.13	71.03	0.6	12.38
Male	Han	No	No	75	19.3698	Stage III-IV	No	Yes	1	115	1.4899	45.7	6.59	0.427	15.43	0.6	13.64
Male	Han	No	No	51	26.2917	Stage I-II	Yes	Yes	0	516	1.37063	50.5	2.53	2.74	34.19	7.46	12.86
Male	Minorities	No	No	70	22.6474	Stage I-II	Yes	Yes	1	282	3.09474	47.75	2.73	19.38	10.36	28.14	13.59
Male	Han	Yes	Yes	54	20.7612	Stage III-IV	Yes	Yes	1	968	2.47917	52.75	4.21	15.14	6.4	4.75	12.04
Male	Han	Yes	Yes	62	24.4473	Stage I-II	No	No	0	15	2.18644	39.4	21.21	1.33	10.45	28.33	12.05
Female	Han	No	No	73	23.3056	Stage III-IV	Yes	No	1	619	0.904977	47.34	1.57	3.31	15.98	12.65	15.04
Female	Han	No	No	56	18.6667	Stage III-IV	No	No	1	83	1.85027	44.49	1.75	208.1	473.7	71.99	31.22
Male	Han	Yes	Yes	76	21.6713	Stage III-IV	No	No	1	171	1.88018	43.35	2.01	9.26	8.71	27.99	11.1
Male	Han	Yes	Yes	66	19.0311	Stage III-IV	Yes	Yes	0	1719	1.55426	45.21	3.42	4.23	7.41	0.826	14.24
Female	Han	No	No	63	23.8751	Stage III-IV	No	Yes	1	546	1.12069	49	3.3	206.6	355.9	0.6	16.61
Female	Han	No	No	51	22.6562	Stage III-IV	No	Yes	0	320	1.53125	50.91	1.92	1.46	22.67	15.12	14.18
Male	Han	No	No	71	22.4913	Stage I-II	No	Yes	1	449	3.11111	40.89	1.76	1.67	20.64	12.14	16.74
Female	Han	No	No	37	24.2382	Stage III-IV	No	Yes	0	545	1.67424	53.2	4.22	30.5	13.79	49.4	10.54
Female	Han	No	No	42	17.0068	Stage III-IV	No	Yes	1	840	4.5625	46.26	2.71	25.7	18.15	42.19	10.67
Female	Han	Yes	Yes	76	25.7812	Stage III-IV	No	No	0	1657	2.28761	44.31	2.19	2.21	6.04	10.24	12.48
Male	Han	Yes	No	69	18.8776	Stage III-IV	Yes	Yes	0	861	3.44571	40	3.8	4.29	18.14	22.06	7.03
Male	Han	No	No	46	24.4898	Stage III-IV	No	Yes	0	984	0.784722	47	6.92	2.91	16.18	1.35	11.45
Male	Han	Yes	No	62	21.9713	Stage III-IV	No	No	1	178	5.40625	41.28	2.03	105.3	24.03	1736	39.11
Male	Han	No	No	56	22.7732	Stage III-IV	No	No	0	596	0.831395	45.5	3.02	7.27	14.48	0.6	13.37
Female	Han	No	No	46	23.1111	Stage I-II	No	No	0	1871	1.56771	46.77	2.68	0.778	8.61	8.21	10.25
Female	Han	No	No	71	22.6409	Stage III-IV	Yes	Yes	0	1401	1.27673	43.61	3.6	146.1	12.39	29.42	11.44
Female	Han	No	No	61	20.7612	Stage I-II	Yes	Yes	0	942	2.09129	44.3	3.65	24.16	24.41	0.6	20.96
Female	Han	No	No	45	18.9736	Stage III-IV	Yes	No	0	524	3.45455	53.9	2.61	1.4	15.13	10.94	12.78
Male	Han	No	No	45	29.4107	Stage III-IV	Yes	No	0	383	2.30508	44.9	3.66	65.01	9.28	0.6	12.21
Male	Han	No	No	66	21.6311	Stage III-IV	Yes	Yes	0	1422	1.41711	40.8	2.32	1.92	40.27	7.19	12.65
Male	Han	No	No	70	23.6652	Stage III-IV	No	No	1	42	2.87215	39.1	3.21	17.85	155	50.74	34.29
Male	Han	No	No	51	25.7812	Stage I-II	No	No	0	1728	2.32039	46.07	7.15	1.22	8.23	7.62	11.18
Male	Han	No	No	56	21.9713	Stage I-II	No	No	1	113	4.34259	38.3	1.31	1.07	28.64	2.07	13.75
Male	Han	Yes	Yes	48	19.3772	Stage III-IV	No	Yes	1	237	1.28384	53.7	3.89	438	9.08	3748	14.84
Female	Han	No	No	70	20.7369	Stage III-IV	No	Yes	0	846	3.52514	40	2.06	1.67	10.15	10.1	10.63
Male	Han	Yes	Yes	59	24.4898	Stage III-IV	Yes	No	0	2079	2.78626	49.46	3.5	5.24	15.62	8.38	14.36
Female	Han	No	No	73	22.8928	Stage III-IV	No	No	1	235	6.00613	32.49	1.55	1216	10.53	14.99	19.79
Female	Han	Yes	Yes	56	24.1415	Stage III-IV	Yes	No	1	667	2.0875	41.6	2.62	22.52	27.16	197.6	9.87
Male	Han	No	No	53	25.0995	Stage I-II	Yes	Yes	0	1253	3.06829	40.3	3.89	2.33	16.92	5.32	20.38
Female	Han	No	No	61	25.6837	Stage I-II	Yes	Yes	0	1131	1.94819	43.36	1.38	37.95	21.11	2.72	9.96
Female	Han	No	No	69	28.125	Stage I-II	Yes	No	0	1213	1.36715	45.03	1.22	1.53	6.41	9.37	16.68
Female	Han	No	No	56	20.7612	Stage III-IV	No	Yes	1	1068	1.93103	43.69	2.88	26.27	11.24	27.18	11.79
Female	Han	No	No	44	15.7943	Stage III-IV	No	Yes	0	199	2.55319	49.43	2.38	10.58	25.42	21.55	12.75
Male	Han	No	No	66	25.763	Stage III-IV	Yes	Yes	0	1261	1.84135	46.61	3.46	8.04	17.71	12.2	15.97
Male	Minorities	No	No	47	27.3356	Stage III-IV	No	Yes	1	640	2.49068	47.53	4.12	7.97	18.09	30.6	8.77
Female	Minorities	No	Yes	50	19.2277	Stage I-II	Yes	Yes	0	1876	2.7381	44.51	1.75	9.29	16.06	1.31	12.96
Male	Han	Yes	No	81	21.4844	Stage III-IV	No	No	0	1072	3.75188	42.1	2.72	2.9	11.72	20.46	10.96
Female	Han	No	No	69	20.5442	Stage III-IV	No	No	1	192	3.38983	37.6	2.52	9.94	6.04	1.47	14.13
Male	Han	No	Yes	45	23.8281	Stage III-IV	Yes	Yes	0	528	1.38125	46.2	3.31	209.8	11.12	826.8	14.75
Female	Han	Yes	Yes	74	22.0317	Stage III-IV	No	No	0	391	1.45748	41.64	2.11	4.72	9.26	12.91	12.45
Female	Han	No	No	51	22.3133	Stage III-IV	Yes	Yes	0	739	1.20199	42.8	1.27	6.04	14.5	15.69	11.76
Female	Minorities	No	No	36	24.4444	Stage I-II	Yes	No	0	118	1.59091	42.1	2.06	4.82	17.16	1.77	14.91
Female	Han	No	No	71	22.8624	Stage III-IV	Yes	Yes	1	842	1.8186	43.73	2.09	424.6	15.62	88.64	14.84
Male	Han	Yes	No	63	20.7612	Stage I-II	Yes	No	0	613	2.04453	40.6	2.03	4.77	10.59	24.2	12.11
Male	Han	No	No	62	25.2363	Stage I-II	No	No	0	1994	1.68085	49.96	2.69	1.78	27.45	13.54	12.15
Male	Han	No	No	84	20.7612	Stage III-IV	No	No	1	54	20.6667	31.6	1.81	52.99	21.63	473	14.03
Female	Han	No	No	81	22.7694	Stage III-IV	No	No	1	31	5.72603	39.53	20.05	9.77	68.03	393.5	32.02
Female	Minorities	Yes	Yes	35	27.5312	Stage III-IV	Yes	No	1	1442	4.79574	46.64	3.52	0.786	14.36	10.23	13.47
Male	Han	Yes	Yes	52	24.2215	Stage III-IV	No	Yes	0	1018	3.27329	45.9	4.76	9.62	42.27	24.34	13.61
Female	Han	No	No	58	27.1111	Stage III-IV	No	Yes	1	996	1.50661	48	3.69	0.465	9.31	5.11	12.89
Female	Han	No	No	66	21.2306	Stage III-IV	No	No	0	552	0.810169	43.1	2.17	2.56	13.15	17.54	8.23
Female	Han	No	No	52	24.8777	Stage III-IV	No	Yes	0	589	1.89899	49.3	1.13	35.01	9.96	21.38	11.98
Female	Han	No	No	43	20.7612	Stage III-IV	Yes	Yes	0	382	2.28481	49.2	3.02	12.15	16.23	1.99	15.73
Male	Han	Yes	Yes	48	20.81	Stage III-IV	Yes	Yes	0	1225	1.30476	46.88	1.98	3.78	8.18	9.92	12.12
Male	Minorities	No	No	74	19.4674	Stage III-IV	No	Yes	0	321	1.78283	45.5	1.52	3.16	10.77	20.17	14.44
Female	Han	No	No	44	25.3906	Stage III-IV	Yes	Yes	0	516	2.27811	46.3	5.94	3.06	20.23	4.94	11.14
Male	Minorities	Yes	Yes	68	19.4674	Stage III-IV	No	No	1	4	7.03636	28.5	3.22	20.04	62.61	56.52	9.23
Female	Han	Yes	Yes	48	23.2254	Stage I-II	Yes	No	0	1787	1.95545	48.54	2.48	7.6	9.73	30.07	12.62
Male	Han	No	No	48	26.6436	Stage I-II	Yes	No	0	977	2.37619	48.6	4.61	1.63	12.83	6.9	8.8
Male	Han	No	No	83	22.0317	Stage III-IV	No	No	0	518	4.30337	39.5	2.02	7.32	53.15	2.18	11.61
Male	Han	No	No	54	19.487	Stage III-IV	No	Yes	0	750	2.37766	40.1	6.4	2.38	52.4	10.8	11.54
Male	Minorities	Yes	Yes	67	24.4898	Stage III-IV	Yes	Yes	0	1699	0.690323	36.91	2.2	5.99	12.09	21.7	7.11
Female	Han	No	No	39	19.052	Stage III-IV	No	Yes	0	364	1.48101	52.6	2.55	1124	33.64	696.4	15.09
Male	Han	No	No	64	26.7229	Stage I-II	No	No	1	1571	1.34722	49.54	1.57	1.83	15.83	10.64	8.88
Female	Han	No	No	75	25.3333	Stage III-IV	No	No	1	266	2.52885	45	4.75	12.11	14.32	19.4	11.83
Male	Han	Yes	Yes	66	29.0698	Stage III-IV	No	Yes	0	423	2.21608	47.7	3.96	13.08	15.55	105.5	11.42
Female	Han	No	No	73	26.5625	Stage III-IV	No	No	0	855	2.06926	44.9	2.65	15.3	27.57	20.45	12.48
Female	Han	No	No	49	23.634	Stage III-IV	No	Yes	0	11	2.41772	44.02	3.66	1.39	8.7	21.56	9.78
Male	Han	Yes	Yes	60	27.9904	Stage I-II	No	No	0	2202	2.35057	42.24	3.06	1.09	11.77	6.38	7.95
Male	Han	Yes	Yes	68	19.5312	Stage I-II	Yes	Yes	0	954	2.72152	44.5	2.53	40.05	8.08	15.31	13.7
Female	Han	No	No	76	24.0344	Stage I-II	Yes	Yes	0	1727	1.82759	45.65	2	149.4	11.71	39.38	8.82
Female	Han	No	No	68	20.2395	Stage III-IV	No	Yes	1	120	2.94839	45	1.11	39.48	170.7	10.41	11.62
Male	Minorities	Yes	Yes	75	17.6309	Stage III-IV	No	Yes	0	383	3.81159	44.1	4.5	6.62	18.48	79.33	15.83
Female	Han	No	Yes	49	22.7732	Stage III-IV	No	Yes	1	768	2.12291	57.9	7.73	35.72	75.55	269	14.89
Female	Han	No	No	62	21.83	Stage III-IV	Yes	Yes	0	1567	1.3907	48.36	2.5	4.5	15.11	12.71	15.44
Male	Han	No	No	66	20.2812	Stage I-II	No	No	0	1001	2.255	42.3	5.19	4.14	14.07	12.55	10.98
Male	Han	Yes	Yes	60	23.4236	Stage III-IV	No	No	0	429	8.04636	35.25	2.49	300.2	50.47	4846	27.84
Female	Han	No	No	108	20.8292	Stage III-IV	No	No	0	57	3.39873	37.9	2.26	12.49	372.5	20.07	28.38
Male	Han	No	No	70	18.2222	Stage I-II	No	No	0	949	2.74093	37.8	8.83	3.61	34.25	16.08	11.1
Male	Han	Yes	Yes	50	22.0386	Stage I-II	Yes	No	0	1517	1.93714	48.06	3.04	1.01	6.41	5.24	13.72
Female	Han	No	No	65	22.8928	Stage III-IV	No	No	0	351	1.625	48.65	4.17	7.51	18.06	31.73	12.41
Male	Han	No	No	52	21.4533	Stage III-IV	Yes	Yes	0	1354	1.38961	45.79	2.4	7.26	19.5	7.51	17.45
Male	Han	Yes	Yes	67	23.5294	Stage I-II	Yes	No	0	530	1.25	40.2	2.19	1.87	12.88	15.39	9.41
Male	Han	No	No	45	20.8325	Stage III-IV	No	No	1	229	1.81598	37.38	2.91	228.5	42.23	1784	65.38
Male	Han	Yes	Yes	69	24.093	Stage I-II	Yes	No	0	1728	1.62687	52.16	4.09	2.01	5.08	10.04	10.8
Female	Han	No	No	55	21.2306	Stage III-IV	No	Yes	0	686	2.76087	36.5	2.39	19.76	17.65	22.6	26.02
Male	Han	Yes	Yes	53	26.7539	Stage I-II	Yes	Yes	0	923	1.46875	51.5	3.19	3.75	5	13.53	13.46
Male	Minorities	Yes	Yes	44	21.9525	Stage III-IV	Yes	Yes	0	1990	2.83133	51.97	2.75	78.64	4.89	282.9	8.34
Female	Minorities	No	No	61	19.5556	Stage I-II	Yes	No	0	1153	0.767857	39	2.01	3.21	10.06	7.86	11.8
Male	Minorities	No	No	72	20.3125	Stage I-II	Yes	No	0	912	0.620112	41.4	2.51	5.91	6.61	9.84	14.09
Male	Han	No	No	64	21.2585	Stage III-IV	No	No	1	753	1.38519	45.42	8.07	6.35	21.15	28.76	13.3
Female	Han	No	No	57	23.2335	Stage III-IV	No	Yes	0	371	1.45333	44.4	3.93	21.47	9.15	10.05	16.27
Male	Han	No	No	55	25.7117	Stage III-IV	No	Yes	0	470	1.56962	43.2	1.6	1258	8.1	20.41	18.16
Male	Han	Yes	No	61	23.9869	Stage I-II	No	No	0	1858	1.53441	48.64	2.96	2.83	35.49	19.62	11.01
Male	Han	No	No	64	20.7612	Stage III-IV	Yes	No	1	31	3.07362	40.5	4.47	4.79	39.59	171.8	370
Male	Minorities	Yes	Yes	61	21.1073	Stage I-II	Yes	Yes	0	1148	2.67204	39.12	1.55	8.6	15.67	6.83	13.32
Female	Han	No	No	49	26.0375	Stage I-II	Yes	Yes	0	986	2.08088	42.1	3.17	2.53	17.19	55.12	12
Male	Minorities	Yes	Yes	64	25.7117	Stage III-IV	No	No	0	7	2.03226	47.75	3.36	198.7	29.29	369.4	58.85
Female	Han	No	No	75	21.4844	Stage III-IV	Yes	No	0	1165	2.42424	42.75	5.26	5.56	10.65	13.27	19.08
Male	Han	Yes	Yes	75	24.9135	Stage I-II	No	Yes	0	2048	2.84615	43.9	2.54	3.06	12.97	45.62	7.5
Male	Han	Yes	Yes	62	19.9573	Stage III-IV	No	No	0	823	4.09483	45.8	2.53	2.25	5.74	23.59	12.14
Female	Han	No	No	53	20.0288	Stage III-IV	No	No	1	100	6.51648	37.3	2.23	35.34	241.6	7.24	21.47
Female	Han	No	No	23	14.8721	Stage III-IV	No	Yes	1	530	1.7377	42.6	3.13	101.8	23.72	0.6	11.3
Male	Han	Yes	Yes	68	21.5645	Stage I-II	Yes	No	1	571	3.10596	34.27	2.5	3.29	11.17	4.76	8.35
Female	Han	No	No	63	21.9388	Stage III-IV	No	No	1	369	1.85047	44.7	2.25	3153	27.29	362.6	50.78
Male	Han	No	No	54	20.2812	Stage III-IV	Yes	Yes	0	586	0.731959	48.9	4.84	13.56	5.26	7.38	17.97
Male	Han	Yes	Yes	21	21.3068	Stage III-IV	No	Yes	0	1008	2.1976	52.4	2.73	2.52	17.44	6.99	23.26
Male	Han	No	No	75	18.8268	Stage III-IV	No	No	1	195	2.88596	41.92	3.78	30.78	20.92	1.32	13.66
Male	Han	No	No	70	27.0538	Stage III-IV	No	No	1	483	2.66207	45.4	2.46	7.03	12.91	13.43	11.32
Male	Han	No	No	85	17.9151	Stage III-IV	No	No	1	221	1.12994	39.6	2.52	28.21	23.08	60.59	17.02
Male	Han	No	No	70	29.2969	Stage III-IV	No	Yes	1	719	2.14146	45.7	3.46	2.26	10.62	13.33	12.71
Male	Han	Yes	Yes	74	17.7154	Stage III-IV	No	No	1	363	2.00926	38.6	2.37	15.69	41.61	14.1	18.5
Female	Minorities	No	No	54	25.8761	Stage I-II	Yes	No	0	1017	1.19178	43.5	2.68	1.6	10.65	14.97	14.28
Female	Han	No	No	45	22.3478	Stage I-II	Yes	Yes	1	671	3.04839	46.22	1.88	6.69	7.22	13.16	12.52
Male	Han	Yes	Yes	59	21.6713	Stage III-IV	No	No	1	201	7.94891	32.95	3.21	2834	245	2042	90.74
Male	Han	Yes	Yes	45	24.093	Stage III-IV	No	Yes	0	419	1.43889	49	2.81	38.18	9.24	227.4	11.97
Male	Han	No	No	69	27.7177	Stage III-IV	Yes	Yes	0	1212	1.71505	43.04	3.2	3.17	11.38	13.16	7.22
Female	Han	No	No	39	21.875	Stage III-IV	Yes	Yes	0	1531	3.06875	43.89	2.79	14.58	21.07	102.8	9.14
Male	Han	No	No	54	25.3906	Stage I-II	Yes	No	0	1788	1.32636	48.71	5.18	1.78	5.33	9.75	9.9
Male	Han	No	No	63	20.7612	Stage I-II	Yes	No	0	1592	2.29114	42.05	3.94	2.6	9.76	7.24	13.23
Female	Han	No	No	52	23.5237	Stage III-IV	Yes	Yes	0	1096	2.16981	47.9	4.46	0.918	16.5	17.9	14.6
Male	Han	Yes	Yes	53	20.6852	Stage I-II	No	No	0	440	1.43	45	3.41	2.39	5	13.25	11.51
Male	Han	No	Yes	58	20.9572	Stage III-IV	Yes	Yes	0	1033	3.85333	50.07	3.41	22.44	22.52	66.09	9.98
Female	Han	No	No	59	19.7239	Stage III-IV	No	No	0	827	6.72549	39.56	3.77	531.4	81.54	1130	11.28
Male	Han	No	No	70	22.4059	Stage I-II	Yes	No	0	584	1.73762	44.25	2.43	10.53	10	23.16	12.57
Female	Han	No	No	56	23.3091	Stage I-II	No	No	0	777	1.28526	43.7	1.93	1.64	21.1	8.97	13.87
Female	Han	Yes	Yes	52	26.4855	Stage III-IV	No	No	0	1925	2.30769	45.87	3.11	0.2	10.81	12.42	9.5
Female	Minorities	No	No	42	23.8751	Stage III-IV	No	Yes	0	1619	2.29353	42.87	2.68	2.62	15.36	37.69	9.74
Female	Han	Yes	Yes	62	22.2063	Stage III-IV	Yes	No	0	1857	2.65833	38.29	2.69	0.674	14.24	9.89	11.32
Male	Minorities	No	No	35	28.7319	Stage III-IV	No	Yes	1	129	1.27273	44.2	2.16	410.4	215.4	20000	21.32
Female	Han	Yes	Yes	67	19.8347	Stage III-IV	No	No	0	2193	0.884615	44.4	1.73	3.39	11.29	5.11	10.92
Male	Han	No	No	53	21.5451	Stage I-II	Yes	Yes	0	896	2.07653	49.4	4.26	3.73	8.65	8.28	15.71
Male	Han	Yes	Yes	66	21.7738	Stage I-II	No	No	0	1661	1.84496	44.69	3.28	3.43	9.47	13.42	12.58
Female	Han	Yes	Yes	71	22.3543	Stage III-IV	Yes	Yes	0	1884	2.17683	46.39	2.11	4.01	27.73	15.07	12.33
Female	Han	Yes	Yes	43	24.7676	Stage III-IV	No	No	0	2069	2.61616	52.18	3.99	2.81	14.04	13.09	10.5
Male	Han	No	No	53	20.0692	Stage III-IV	No	No	1	205	1.56338	45.12	1.23	7.26	6.41	0.6	11.12
Female	Han	No	No	74	18.7305	Stage I-II	Yes	No	0	364	1.07407	45.3	5.27	0.955	10.34	9	13.67
Male	Han	Yes	Yes	46	25.3444	Stage I-II	No	No	0	1619	2.72678	48.43	2.49	2.8	16.6	15.49	8.63
Male	Han	Yes	Yes	51	20.202	Stage III-IV	Yes	No	0	2037	1.26087	44.35	4.87	1.07	6.55	13.54	9.5
Male	Minorities	No	No	61	21.6713	Stage III-IV	No	No	0	2026	1.2905	45.36	3.39	3.2	9.69	0.6	10.4
Male	Han	Yes	Yes	42	18.8707	Stage III-IV	No	Yes	0	119	1.80508	41.64	1.64	3.11	69.18	14.82	9.2
Female	Han	No	No	72	19.2234	Stage I-II	Yes	No	0	1112	1.63871	48.6	2.67	1.73	8.88	12.67	12.05
Female	Han	Yes	Yes	71	27.5312	Stage III-IV	No	Yes	1	601	5.16279	37.03	1.93	9.2	15.18	347.2	12.31
Male	Han	No	No	76	24.4141	Stage III-IV	No	Yes	0	546	1.90863	44.8	2.48	20.88	17.8	8.74	11.38
Male	Han	No	No	63	21.3333	Stage III-IV	No	Yes	0	290	1.05978	43.5	4.86	2.3	132.6	11.36	12.73
Male	Minorities	Yes	No	42	25.9516	Stage III-IV	Yes	Yes	0	1067	2.2094	48.56	5.63	16.9	10.98	7.37	14.77
Male	Han	Yes	Yes	79	19.5006	Stage III-IV	No	No	1	417	3.23776	42	4.16	4.66	19.87	16.13	105.1
Male	Han	No	No	48	21.4692	Stage III-IV	No	No	0	569	1.83893	45.5	10.46	1.53	9.19	6.04	12.22
Female	Minorities	No	No	46	24.2382	Stage III-IV	Yes	Yes	0	336	2.49194	54	7.8	1.49	10.49	7.64	17.47
Male	Han	No	No	39	21.6311	Stage III-IV	No	No	1	531	1.52555	49	4.36	133.9	8.24	0.6	17.71
Female	Han	No	No	52	24.4352	Stage III-IV	Yes	No	0	1036	1.21927	43.9	2.74	29.07	25.26	47.19	12.69
Male	Minorities	No	No	29	18.3655	Stage III-IV	Yes	Yes	1	1144	2.375	51.1	4.15	19.61	9.55	54	14.64
Male	Han	Yes	Yes	61	21.3039	Stage III-IV	No	No	0	381	3.84459	42.3	1.91	3.63	34.87	0.6	12.8
Male	Han	Yes	Yes	60	22.8571	Stage III-IV	Yes	No	0	1354	2.32331	39.2	4.95	8.04	7.29	133.4	8.88
Male	Han	Yes	Yes	68	19.0311	Stage III-IV	No	No	1	282	3.75214	42.29	3.3	3.96	6.55	25.4	15.94
Female	Han	No	No	45	25.8065	Stage III-IV	No	No	1	568	1.99432	45.2	2.47	240.9	9.34	0.716	18.23
Female	Minorities	No	No	73	23.9796	Stage I-II	Yes	Yes	0	1369	1.87793	44.32	2.22	87.27	12.23	134.5	18.46
Female	Han	No	No	63	21.6413	Stage III-IV	No	Yes	1	159	1.93478	53.4	2.97	26.17	18.18	216.5	27.29
Female	Han	No	No	66	23.4375	Stage III-IV	No	Yes	1	1503	2.44253	43.49	3.2	37.87	29.57	195.8	15.52
Female	Han	No	No	49	18.75	Stage III-IV	Yes	Yes	0	1714	0.737069	46.23	3	0.589	28.28	8.7	9.34
Female	Han	No	No	45	26.986	Stage III-IV	No	Yes	0	9	1.21032	44	3.83	2.08	12.57	12.26	12.13
Female	Han	No	No	55	20.7612	Stage I-II	Yes	No	0	1099	2.0719	48	3.03	0.754	9.25	5.78	10.33
Male	Han	Yes	Yes	54	23.3067	Stage III-IV	No	No	1	1076	1	43.78	3.98	37.01	15.5	27.38	7.4
Female	Minorities	No	No	69	20.8889	Stage III-IV	No	Yes	1	383	2.37113	47.5	3.11	168.2	12.71	1.75	12.08
Male	Han	Yes	Yes	61	20.0796	Stage I-II	Yes	Yes	0	892	1.74332	49	4.83	13.64	9.51	12.01	15
Female	Minorities	No	No	53	19.9219	Stage III-IV	No	Yes	1	163	4.9625	40.7	0.767	10.86	30.55	26.73	39.32
Male	Han	Yes	Yes	57	14.7011	Stage III-IV	No	Yes	1	293	2.42405	41	1.35	16.69	16.77	93.26	13.76
Female	Han	No	No	74	15.4006	Stage III-IV	No	No	1	125	6.09032	34.48	1.84	2172	42.85	3325	74.81
Female	Han	No	No	60	18.6667	Stage III-IV	No	Yes	1	1018	6.01481	38.59	6.36	39.64	209.8	28.16	27.29
Male	Minorities	No	No	68	20.7612	Stage III-IV	No	No	0	464	2.65025	45.1	3	4.56	20.2	16.92	13.58
Male	Han	No	No	70	24.093	Stage III-IV	No	Yes	0	1377	2.6755	50.86	2.51	9.98	14.45	26.81	15.42
Male	Han	No	No	68	19.5312	Stage III-IV	No	No	0	21	2.02713	43.5	2.78	52.86	20.22	32.27	19.73
Female	Han	No	No	36	27.268	Stage III-IV	Yes	No	0	953	2.90741	45.4	3.38	1.51	19.87	11.58	12.39
Female	Minorities	No	No	42	16.8663	Stage I-II	No	Yes	0	1261	5.31325	33.57	1.5	9.46	19.59	26.65	10.59
Female	Han	No	No	73	22.7694	Stage III-IV	No	Yes	0	1488	1.67262	41.11	3.06	1.34	32.93	6.67	13.63
Male	Han	Yes	No	60	28.2284	Stage I-II	No	No	0	1179	2.81132	45.9	1.99	1.28	9.11	6.01	8.93
Male	Han	Yes	No	50	20.7031	Stage I-II	Yes	Yes	0	1393	3.85517	45.05	2.48	13.66	13.35	15.75	12.17
Male	Han	No	No	72	21.4844	Stage I-II	No	Yes	0	1295	6.11765	42.37	2.07	2.51	17.52	7.76	14.68
Female	Han	No	No	72	22.9592	Stage III-IV	No	No	1	379	2.63636	43.74	4.31	41.22	25.95	11.81	19.39
Female	Han	No	No	80	27.8742	Stage III-IV	Yes	No	1	1115	2.12605	42.18	2.73	4.72	12.27	7.68	10.92
Female	Han	Yes	Yes	46	24.7676	Stage III-IV	No	Yes	1	1262	2.44022	51.8	3.16	4.63	20.98	33.61	12.45
Male	Minorities	No	No	62	19.2672	Stage I-II	No	Yes	1	168	5.38182	43.4	2.19	5.15	55.95	20.32	15.17
Male	Han	Yes	Yes	74	23.8754	Stage III-IV	Yes	Yes	0	531	2.31288	48.13	1.76	8.05	24.01	0.6	11.34
Female	Han	No	No	64	25.8065	Stage III-IV	No	No	0	424	1.58621	42.7	2.32	202.8	13.91	33.53	17.91
Male	Han	No	No	47	23.03	Stage III-IV	No	Yes	0	822	4.17544	46.52	3.43	1.82	6.3	13.75	14.65
Male	Han	Yes	Yes	50	24.3824	Stage I-II	Yes	Yes	0	960	1.83146	43.3	1.4	2.02	9.07	16.75	12.81
Female	Minorities	No	No	70	20.9275	Stage I-II	Yes	Yes	0	1280	1.95635	48.82	2.47	1.42	6.89	12.72	12.71
Male	Han	No	No	69	22.3081	Stage III-IV	No	No	0	22	4.88166	35.33	4.58	337.4	165	8685	23.43
Male	Han	No	No	57	22.0386	Stage I-II	Yes	No	0	1080	3.66495	36.8	1.38	3.26	20.42	11.9	11.35
Female	Han	Yes	Yes	59	22.2656	Stage III-IV	No	No	0	77	3.51908	42.76	2.06	151.4	12.15	39.94	15.02
Male	Han	Yes	Yes	58	19.6052	Stage III-IV	No	Yes	0	873	1.36	43.4	2.96	7.28	9.3	14.95	9.51
Male	Han	Yes	No	50	21.7994	Stage III-IV	No	Yes	0	173	4.36842	44	2.78	13.26	20.55	141.2	12.56
Male	Han	Yes	Yes	60	24.539	Stage III-IV	Yes	Yes	0	1701	2.3612	47.64	3.21	2.49	15.43	8.7	8.93
Male	Han	Yes	No	40	19.3772	Stage III-IV	No	Yes	1	302	4.70629	41.97	5.39	1300	455.6	4.35	81.71
Male	Han	No	No	59	19.1467	Stage I-II	Yes	No	0	1118	2	43.4	4.19	2.14	12.73	1.55	13.08
Male	Han	Yes	Yes	75	20.0617	Stage I-II	No	No	0	6	2.59669	41.6	3.67	11.7	48.24	31.19	6.82
Male	Han	No	No	60	20.9366	Stage I-II	Yes	No	0	546	0.814978	46.2	6.8	13.08	13.71	38.95	13.02
Male	Han	No	No	66	19.0311	Stage III-IV	No	Yes	1	318	2.58879	39.48	2.3	68.35	7.87	10.73	20.55
Female	Han	No	No	45	20.7031	Stage I-II	Yes	No	0	436	2.1345	42.37	2.25	4.26	31.53	1.64	11.29
Male	Han	Yes	Yes	67	20.7612	Stage I-II	No	Yes	0	2076	1.38776	46.18	4.08	1.81	15.44	8.85	10.49
Male	Han	Yes	Yes	50	30.8248	Stage III-IV	No	No	0	2000	1.85612	45.17	3.7	0.37	13.22	14.74	19.74
Female	Han	No	No	61	23.0681	Stage III-IV	Yes	Yes	0	1157	10.6763	53.1	2.21	16.83	6.27	6.76	10.78
Female	Han	Yes	Yes	35	20.202	Stage III-IV	Yes	Yes	0	1849	1.51837	35.48	4.51	484.5	22.61	752.5	9.15
Male	Han	No	No	44	21.9136	Stage III-IV	No	Yes	1	380	2	48	5.54	26.55	13.17	0.869	30.81
Male	Han	Yes	Yes	45	21.2585	Stage III-IV	No	No	1	1146	2.38043	43.28	2.46	88.36	17.44	96	15.41
Male	Han	No	No	75	25.7117	Stage III-IV	Yes	Yes	0	1459	2.16667	45.94	1.7	8.92	9.29	16.03	10.09
Male	Han	No	No	72	23.5556	Stage III-IV	No	No	1	72	3.30769	35.56	2.33	10.12	9.1	4.9	11.02
Female	Han	No	No	49	18.3594	Stage III-IV	Yes	Yes	1	1332	1.73333	50.83	3.26	2.91	9.82	33.6	10.59
Male	Han	No	No	58	24.6094	Stage I-II	Yes	No	0	1699	4.33099	36.7	3.61	0.765	15.19	7.44	6.46
Male	Han	No	No	60	23.5102	Stage I-II	No	No	1	666	1.41245	43.1	4.49	1.06	9.66	5.59	10.49
Male	Han	Yes	Yes	60	20.4444	Stage III-IV	No	Yes	0	47	2.46429	33	2.75	25048	112.4	2329	211.3
Female	Han	No	No	72	23.2335	Stage I-II	No	No	0	2043	1.9898	41.19	2.02	2.9	9.72	9.12	12.68
Male	Han	Yes	Yes	74	25.8065	Stage III-IV	No	No	0	1192	1.7085	44.57	2.3	106.5	12.41	19.5	12.73
Male	Minorities	No	No	66	19.4674	Stage III-IV	No	No	0	10	2.7897	39.43	2.3	24.84	20.24	9.06	20.49
Male	Han	No	No	69	25.2174	Stage III-IV	Yes	Yes	1	1372	3.12579	46.45	3.12	45.38	8.11	38.29	11.6
Male	Minorities	Yes	Yes	54	21.2585	Stage III-IV	No	Yes	1	485	2.11682	45.7	3.36	150.7	27.63	475.4	16.15
Female	Han	No	No	74	22.8269	Stage III-IV	Yes	No	0	476	2.14573	44.1	2.18	12.87	9.45	25.55	17.6
Female	Minorities	No	No	70	16.8887	Stage III-IV	No	Yes	1	639	2.85088	37.39	1.15	127.4	13.14	0.855	8.28
Male	Han	Yes	No	59	20.9572	Stage III-IV	No	Yes	0	655	2.45185	47	1.16	125.2	8.66	37.45	20.45
Male	Han	No	Yes	57	24.7409	Stage III-IV	Yes	Yes	1	833	2.82645	51.11	4.32	310	24.68	189.1	19.84
Male	Han	Yes	Yes	58	18.194	Stage III-IV	No	Yes	0	551	1.68534	39.8	5.54	31.61	16.36	0.669	12.92
Male	Han	Yes	Yes	51	30.7306	Stage III-IV	No	Yes	0	342	2.5	47.7	1.85	2.43	8.67	9.54	15.88
Female	Han	Yes	Yes	43	26.7698	Stage III-IV	No	No	1	665	3.68966	46.71	3.5	22	12.93	28.54	12.29
Male	Han	No	No	48	30.1194	Stage I-II	Yes	No	0	1367	2.088	50.6	2.7	1.24	10.05	7.85	14.2
Female	Han	No	No	51	23.4221	Stage III-IV	Yes	Yes	0	636	2.40606	47.4	2.57	5.93	18.17	11.68	15.43
Female	Minorities	No	No	54	27.5482	Stage III-IV	Yes	Yes	0	890	2.34426	50.3	4.64	2.16	10.33	20.59	20.63
Female	Han	No	No	62	27.7767	Stage III-IV	Yes	No	0	1245	1	38.95	2.66	2.99	12.55	9.69	8.92
Male	Han	No	No	67	22.8374	Stage III-IV	No	Yes	0	757	5.18182	48.2	2.29	3.8	12.29	0.6	15.78
Male	Han	No	No	25	19.7232	Stage III-IV	No	Yes	1	219	3.34	53.62	0.893	51.22	13.59	8	17.39
Male	Han	No	No	75	24.2215	Stage III-IV	Yes	Yes	1	1619	2.63964	43.74	3.78	6.05	25.98	14.13	13.91
Female	Han	No	No	64	22.8329	Stage III-IV	Yes	Yes	0	807	3.16084	44.9	5.06	11.15	9.57	15.71	16.11
Male	Han	No	No	67	27.1809	Stage I-II	No	No	0	2178	1.74797	44.64	6.03	1.26	14.2	0.6	14.48
Male	Minorities	No	Yes	69	18.4672	Stage I-II	Yes	No	0	913	2.03727	42.9	3.14	3.07	10.74	15.53	10.95
Female	Han	No	No	64	21.3675	Stage III-IV	No	No	0	1294	1.57792	41.43	1.25	39.29	8.54	47.31	14.74
Male	Han	Yes	Yes	62	16.563	Stage III-IV	No	Yes	1	814	2.73636	47.45	3.3	13.18	6.41	20.22	11.83
Female	Han	No	No	73	20.7612	Stage III-IV	No	No	1	1541	4.70909	39.44	1.7	3.3	16.09	9.75	10.34
Female	Han	No	No	64	22.3081	Stage III-IV	No	Yes	0	531	2.47929	48.5	1.96	160.3	17.41	7.31	17.18
Male	Han	Yes	Yes	45	25.3906	Stage III-IV	Yes	Yes	0	1337	1.33005	45.13	2.37	2.24	7.83	14.32	9.22
Male	Han	Yes	Yes	64	20.7476	Stage I-II	No	Yes	0	1457	3.62304	41.62	3.3	32.22	8.5	5.13	13.75
Male	Han	No	No	66	21.6713	Stage III-IV	Yes	Yes	1	637	3.09615	48.96	5.47	6.04	21.9	37.09	12.93
Female	Han	No	No	51	21.5045	Stage I-II	Yes	Yes	0	984	1.07447	40.7	1.47	20.8	23.48	12.09	15.96
Female	Han	Yes	Yes	48	24.4352	Stage III-IV	No	No	0	575	2.38971	45.24	1.75	5.33	7.8	38.52	11.38
Male	Han	Yes	Yes	72	20.7612	Stage III-IV	Yes	Yes	0	429	3.6831	47.7	3.9	2.19	10.79	17.28	18.67
Female	Han	No	No	56	20	Stage III-IV	No	Yes	1	275	3.34896	42.43	2.78	10.34	19.27	284.4	15.15
Male	Minorities	No	No	61	22.0386	Stage III-IV	Yes	Yes	0	1380	3.8125	41.21	2.08	6.76	18.37	1.22	9.82
Male	Han	Yes	Yes	63	22.5896	Stage III-IV	No	Yes	0	608	1.69048	49.3	4.49	4.19	11.45	19.92	16.01
Female	Han	No	No	53	26.6667	Stage III-IV	Yes	Yes	1	170	1.46512	46.6	3.77	13.89	12.53	13.3	11.04
Male	Han	Yes	Yes	68	23.1834	Stage I-II	Yes	Yes	0	1250	2.96703	49	4.28	3.19	7.71	3.44	12.6
Male	Han	No	No	62	21.3859	Stage I-II	Yes	No	0	1535	1.11722	48.32	1.77	3.18	18.9	1.11	8.49
Male	Han	No	No	73	27.143	Stage III-IV	Yes	Yes	0	1023	2.14224	41.6	2.37	4.13	17.22	25.55	15.92
Female	Han	No	No	66	25.3906	Stage III-IV	Yes	Yes	0	687	2.5	47.9	2.88	3.53	21.03	0.6	22.17
Male	Han	No	No	62	20.7612	Stage III-IV	No	No	1	156	2.08299	41.88	2.85	5.63	319.8	15.36	11.09
Male	Han	Yes	Yes	43	22.4996	Stage III-IV	Yes	Yes	0	1333	0.965418	46.25	7.78	1.98	9.55	3.82	11.69
Male	Han	Yes	No	73	26.4236	Stage III-IV	Yes	No	1	1789	2.70504	43.36	2.21	8.72	17.08	45.74	9.02
Male	Han	Yes	Yes	54	27.6817	Stage III-IV	No	No	0	91	2.93488	48.5	2.78	8.03	13.43	24.07	16.07
Male	Han	No	No	67	22.0386	Stage I-II	Yes	No	0	1581	2.36	49.49	2.5	4.28	14.71	22.31	9.75
Male	Minorities	No	No	65	21.4533	Stage III-IV	Yes	Yes	0	840	1.70833	42.2	3.52	134.6	9.16	19.24	12.4
Female	Han	No	No	79	22.0604	Stage III-IV	No	No	1	58	1.52941	18.79	2.58	8.4	798.1	22.58	7.2
Female	Han	No	No	76	22.2222	Stage I-II	Yes	No	0	335	1.41905	47.6	3.06	7.36	12.89	10.11	12.42
Female	Han	No	No	59	21.299	Stage I-II	Yes	Yes	0	671	5.72973	40.42	1.28	17.02	6.21	9.72	13.99
Female	Han	No	No	62	24.4561	Stage III-IV	No	Yes	0	620	1.22768	45.9	2.68	2.27	7.83	26.61	15.02
Female	Han	No	No	56	23.9361	Stage I-II	Yes	Yes	1	873	2.23034	46.74	2.84	2.16	11.96	14	12.4
Male	Han	Yes	Yes	46	20.3223	Stage III-IV	No	Yes	1	745	2.86667	46.86	2.11	17.1	21.29	1467	7.08
Female	Han	No	No	69	21.9261	Stage I-II	No	No	0	918	1.23077	44.5	4.24	2.67	29.85	51.76	15.67
Male	Han	No	No	59	28.125	Stage I-II	Yes	No	0	1800	2.32642	39.5	2.51	3.2	10.12	21.72	15
Male	Han	No	Yes	34	23.1834	Stage III-IV	No	Yes	0	497	2.33333	50.9	5.13	11.14	13.34	7.58	18.63
Male	Han	Yes	Yes	64	20.7612	Stage I-II	No	No	0	4	2.8303	46.36	3.55	4.97	17.19	24.11	16.04
Male	Han	No	No	72	27.3438	Stage I-II	Yes	No	0	525	1.44828	48	2.56	5.17	10.87	0.6	10.42
Male	Han	Yes	Yes	72	19.9219	Stage III-IV	No	No	0	11	3.34	44.32	4.78	2.47	4.91	11.22	13.73
Male	Han	No	No	53	25.4327	Stage I-II	Yes	Yes	0	1529	1.65145	51.59	2.56	118.9	20.75	225.5	15.49
Male	Minorities	Yes	Yes	52	22.3214	Stage I-II	Yes	No	0	799	2.30476	51	2.82	3.07	19.04	8.41	11.61
Male	Han	Yes	Yes	41	20.7612	Stage I-II	Yes	Yes	0	1314	3.24873	47.87	0.993	8.97	11.1	1.77	9.64
Male	Han	Yes	Yes	54	18.2531	Stage I-II	Yes	Yes	0	1379	2.79426	45.86	2.1	33.35	11.13	14.49	10.98
Male	Han	No	No	53	23.6244	Stage III-IV	No	Yes	1	471	4	46.76	2.51	2.69	6.06	15.26	12.9
Male	Han	Yes	Yes	47	23.2335	Stage III-IV	Yes	Yes	0	858	9.11667	46	2.37	8.2	13.35	15.1	11.14
Male	Han	Yes	Yes	45	16.5147	Stage III-IV	No	No	0	456	1.35638	42.5	4.62	1229	19.69	84.21	11.75
Male	Han	No	No	47	22.3081	Stage III-IV	Yes	No	0	1028	1.42244	42.6	5.15	5.35	13.3	0.735	14.55
Male	Han	No	No	38	21.0077	Stage I-II	Yes	No	0	1670	1.64681	50.91	2.76	0.641	13.13	9.69	11.48
Male	Han	Yes	Yes	63	20.7612	Stage III-IV	Yes	No	1	977	1.24107	41.57	3.44	17.17	7.3	0.6	15.1
Female	Han	No	No	52	24.6094	Stage I-II	Yes	No	0	1171	1.33636	47.8	2.32	0.777	15.8	10.63	12.55
Male	Han	No	No	43	19.7239	Stage III-IV	Yes	Yes	0	487	2.3057	42.17	2.74	0.969	10.6	8.79	8.77
Male	Han	Yes	No	52	20.0288	Stage III-IV	Yes	Yes	0	585	3.34518	40.4	2.29	16.23	15.13	10.72	10.41
Female	Han	No	No	52	22.8269	Stage III-IV	Yes	Yes	1	248	4.09524	45.43	4.75	186	13	1960	55.59
Female	Han	No	No	63	28.3531	Stage I-II	No	No	0	434	4.78395	46.19	2.52	2.05	15.45	6.19	12.68
Female	Han	No	Yes	46	24.977	Stage I-II	No	Yes	0	1359	1.84314	48.1	2.79	1.26	13.52	8.2	9.53
Male	Han	No	No	54	23.3067	Stage I-II	Yes	No	0	1001	1.8189	47.4	3.21	4.42	7.32	7.49	16.18
Male	Han	No	No	54	22.0581	Stage III-IV	Yes	Yes	0	575	2.12	48.1	1.6	1.85	3.99	1.84	11.47
Female	Han	No	No	63	14.8605	Stage III-IV	No	Yes	0	14	5.41333	34.1	4.02	2.39	11.09	5.57	10.65
Female	Han	No	No	36	21.6441	Stage III-IV	No	Yes	0	1488	2.67273	43.76	2.59	1.94	25.49	4.78	12.24
Male	Han	No	No	65	23.2377	Stage I-II	Yes	No	0	885	0.91573	39.8	1.58	2.72	16.12	11.05	11.54
Male	Han	No	No	32	17.6309	Stage III-IV	No	Yes	1	283	2.16727	52.8	1.89	2	33.38	2.8	15.2
Male	Han	Yes	Yes	63	27.0842	Stage I-II	Yes	No	0	1142	2.0687	46.02	3.27	3.5	13.56	13	14.99
Female	Han	No	No	87	19.563	Stage I-II	No	No	0	694	0.886427	42.6	2.79	1.84	17.61	11.54	12.64
Female	Han	No	No	66	19.8791	Stage III-IV	No	Yes	0	455	0.57037	45.3	2.55	6.32	6.44	13.15	9.56
Male	Han	No	No	76	24.3824	Stage III-IV	Yes	Yes	0	1581	2.58	44.16	3.76	4.81	21.36	29.23	13.88
Female	Minorities	No	No	54	22.1003	Stage III-IV	No	Yes	1	268	1.41089	44.6	2.43	3.43	15.96	0.613	12.37
Female	Han	Yes	Yes	58	31.25	Stage III-IV	No	No	0	1296	1.86466	45.15	2.08	3.65	10.7	16.44	12.44
Female	Han	No	No	46	15.625	Stage III-IV	No	Yes	0	925	3.72727	52.1	5.37	190.8	35.3	139.9	9.81
Male	Han	Yes	Yes	55	22.8374	Stage I-II	Yes	Yes	0	862	2.56923	41.6	4.99	7.86	5.32	29.1	16.03
Female	Han	No	No	69	25.4767	Stage III-IV	Yes	Yes	0	1664	2.86792	44.18	2.67	1.35	10.83	45.3	7.5
Male	Han	No	No	78	20.5688	Stage III-IV	No	No	0	21	1.03909	42.04	1.33	229.5	34.08	42.16	34.16
Male	Han	No	No	57	28.2828	Stage III-IV	No	Yes	0	899	2.49741	44.7	3.83	1.32	5.74	20.46	14.86
Male	Han	Yes	Yes	71	19.1467	Stage I-II	Yes	No	0	346	2.39053	45.5	4.37	2.39	9.05	5.5	13.5
Male	Minorities	Yes	Yes	67	17.9688	Stage III-IV	Yes	No	0	1780	2.63768	44.56	5.23	21.83	10.7	2.45	15.66
Male	Han	No	No	45	25.9516	Stage I-II	No	Yes	0	762	7.49677	42.3	3.61	3.06	85.21	274.5	8.89
Male	Han	No	No	58	21.2953	Stage I-II	Yes	Yes	0	1720	0.991429	44.14	1.83	3.18	6.84	7.31	11.02
Female	Han	No	No	57	25.721	Stage III-IV	Yes	Yes	0	1853	1.69355	39.77	1.4	4.01	11.51	14.43	10.2
Male	Han	Yes	Yes	67	20.5693	Stage III-IV	No	No	0	2055	6.37984	36.8	0.996	0.653	207.7	5.82	10.44
Male	Han	No	No	67	16.4062	Stage III-IV	No	Yes	0	1088	1.54774	42.3	6.55	3.19	66.23	8.81	13.71
Male	Han	No	No	77	20.7612	Stage III-IV	Yes	No	0	33	6.56627	38.7	21.79	2.17	27.81	9.94	16.39
